# Supplementary material for: Chemical amplification accelerates reactive oxygen species triggered polymeric degradation
Source: Royal Society of Chemistry journal article supplement (doi:10.1039/c7bm00758b), 2017-11-28
Supplement: c7bm00758b1.pdf [file c7bm00758b1.pdf]

Supporting information

## **Chemical Amplification Accelerates Reactive Oxygen Species Triggered Polymeric Degradation**

Sangeun Lee, Alexandra Stubelius, Jason Olejniczak, Hongje Jang,  
Viet Anh Nguyen Huu and Adah Almutairi

### **Contents**

**Figure S1. NMR spectra of compound 3**

**Figure S2. NMR spectra of ROS-ARP**

**Figure S3. GPC profile of ROS-ARP in various pH and presence of H<sub>2</sub>O<sub>2</sub>**

**Figure S4. ROS-ARP molecular weight change by pH and H<sub>2</sub>O<sub>2</sub>**

**Figure S5. GPC profile of ROS-ARP in 0 mM and 10 mM H<sub>2</sub>O<sub>2</sub>**

**Figure S6. DLS and TEM image of ROS-ARP NPs**

**Figure S7. ROS-ARP NPs stability test**

**Figure S8. Representative TEM images of ROS-ARP nanoparticles in 0 mM and 10 mM H<sub>2</sub>O<sub>2</sub>**

**Figure S9. AUC Calculation of released IR-780 at pH 7.4 with 1 mM H<sub>2</sub>O<sub>2</sub>, and input parameters**

**Figure S10. Standard curve of AUC of IR-780 loaded ROS-ARP NPs**

**Figure S11. Separated IR-780 NPs signal from released IR-780 after Gaussian fitting**

**Figure S12. Cell viability test**

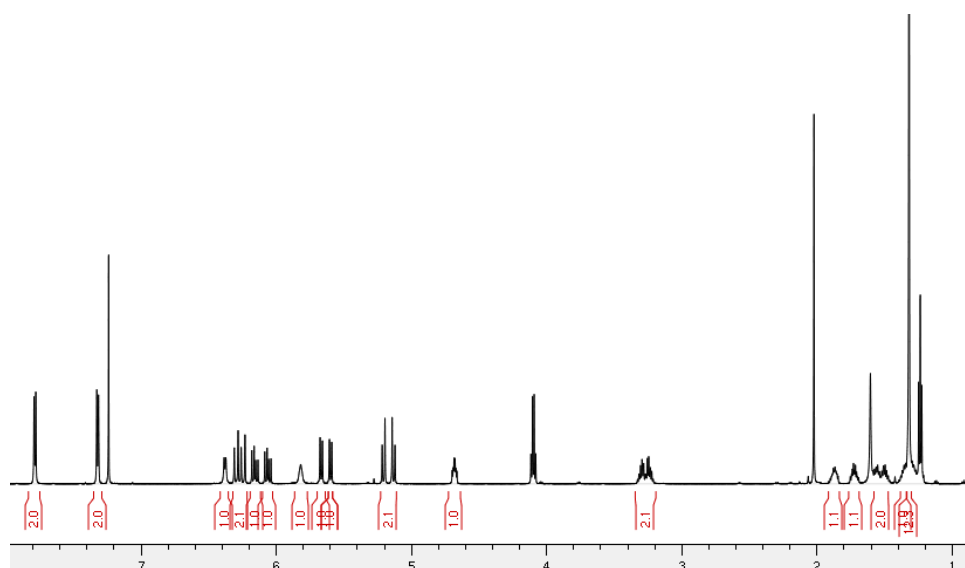

**Figure S1. NMR spectra of compound 3**

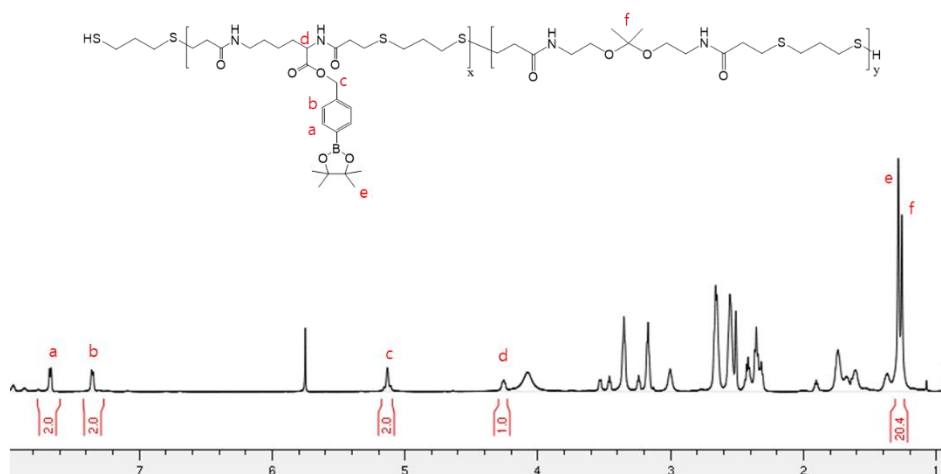

**Figure S2. NMR spectra of ROS-ARP**

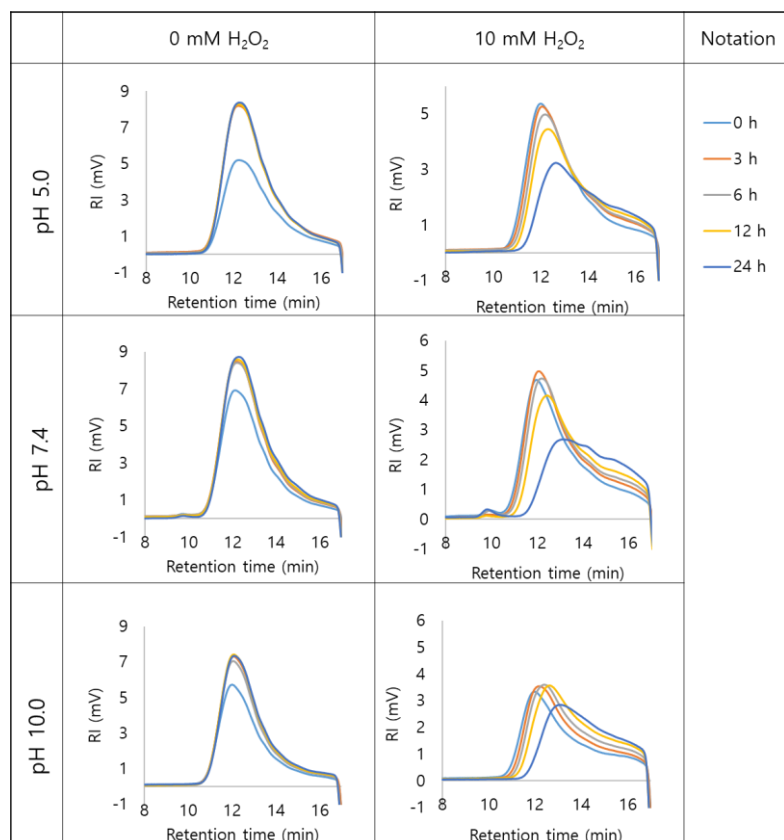

**Figure S3.** GPC profile of ROS-ARP in various pH and presence of H<sub>2</sub>O<sub>2</sub>. x/y axis is retention time/RI signal intensity.

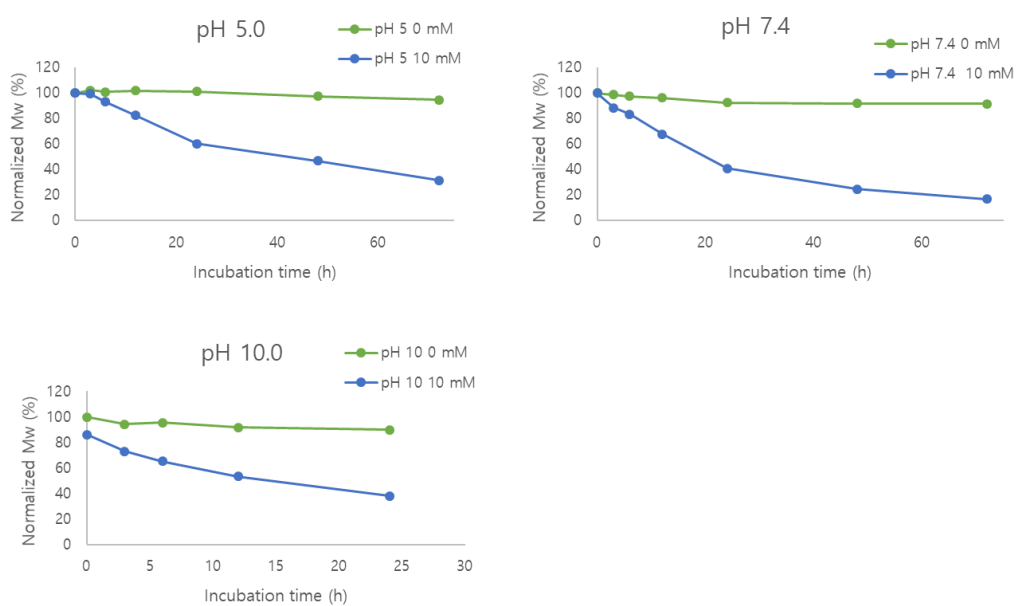

**Figure S4.** ROS-ARP molecular weight change by pH and H<sub>2</sub>O<sub>2</sub>. x/y axis represents incubation time/% molecular weight. Polymer incubated with 10 mM H<sub>2</sub>O<sub>2</sub> (blue) and without H<sub>2</sub>O<sub>2</sub> (green).

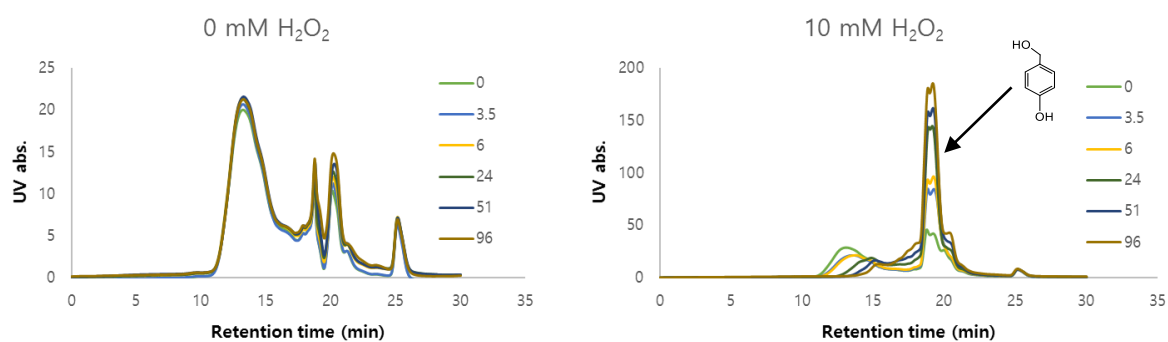

Figure S5. GPC profile of ROS-ARP in 0 mM (left) and 10 mM (right)  $\text{H}_2\text{O}_2$ . x/y axis is retention time/UV absorption signal intensity. (Retention time of 4-hydroxybenzyl alcohol was 19.7 min)

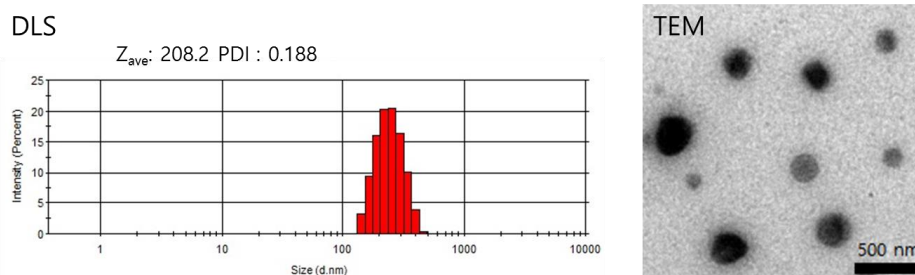

Figure S6. ROS-ARP NPs. Left is DLS data of particle and right is image of particles observed by TEM

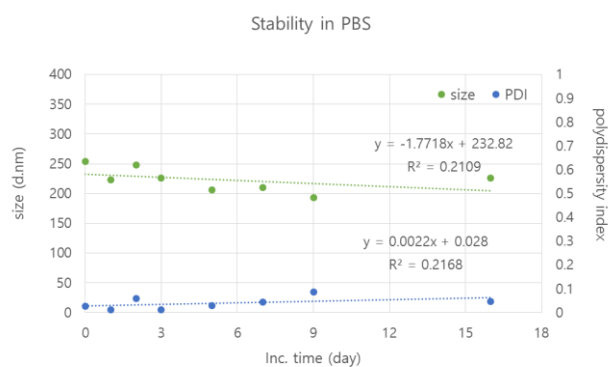

Figure S7. ROS-ARP NPs stability test by size and polydispersity change. Particles in phosphate buffer are incubated at 37 °C for 16 days.

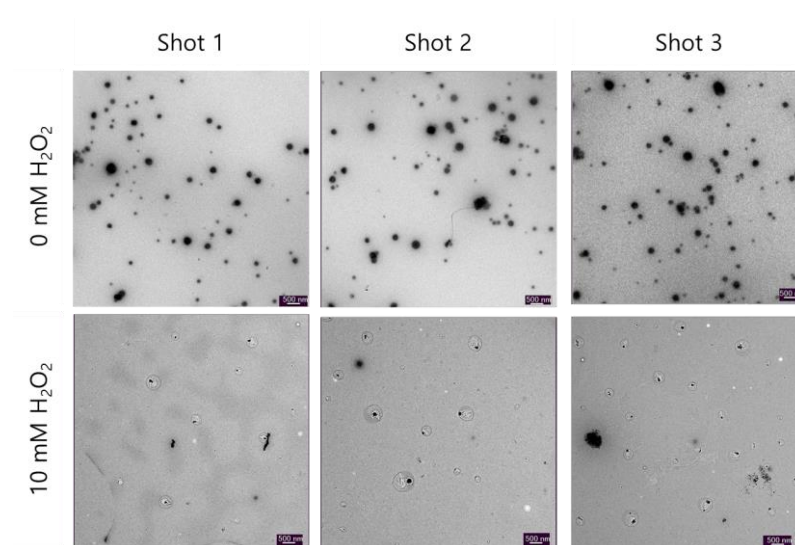

**Figure S8. Representative TEM images of ROS-ARP nanoparticles in 0 mM H<sub>2</sub>O<sub>2</sub> and 10 mM H<sub>2</sub>O<sub>2</sub>**

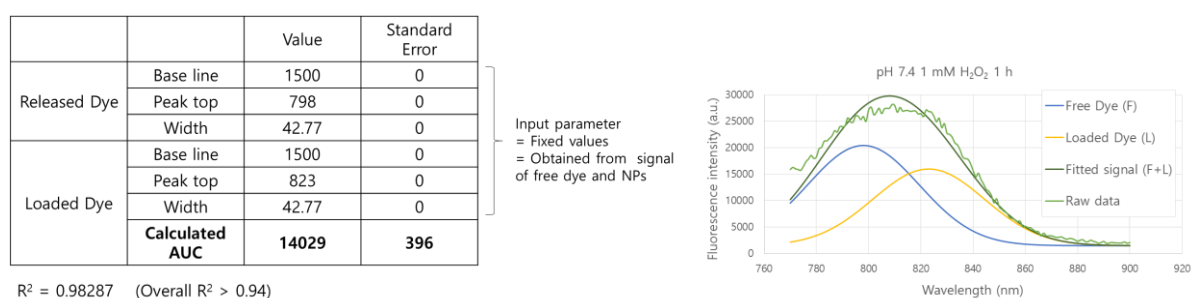

**Figure S9. AUC Calculation values of released IR-780 at pH 7.4 with 1 mM H<sub>2</sub>O<sub>2</sub>, and input parameters for calculation. Input parameters were obtained from measurement of free IR-780 in same condition. (Left) Fluorescence signal and separated loaded and released dye signal by fitting. (Right)**

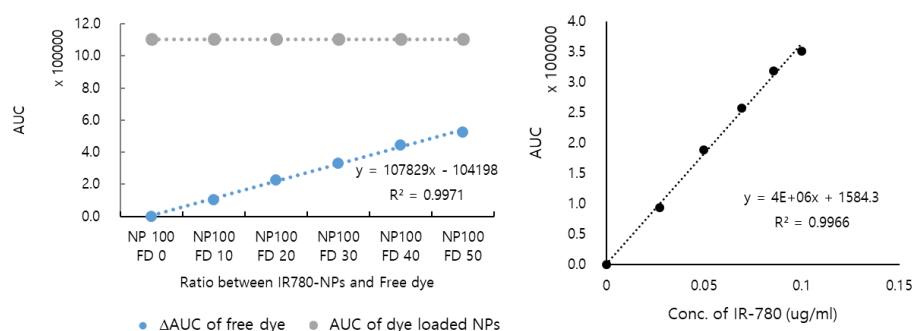

**Figure S10. Calculated AUC of IR-780 loaded ROS-ARP NPs and free IR-780 by various mixing ratio. (Left) Calculated AUC of free IR-780 by its concentration. (Right)**

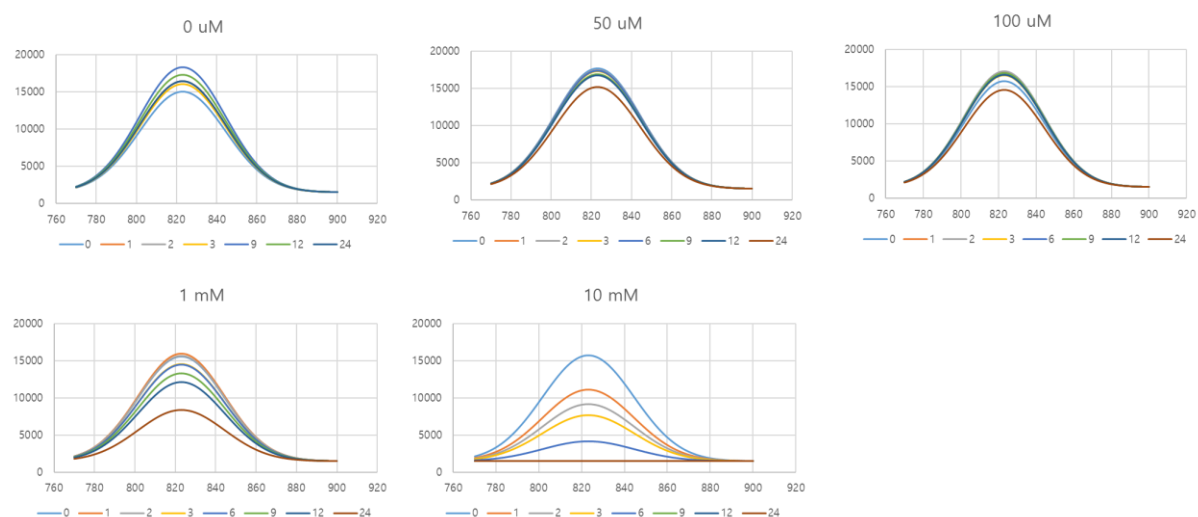

**Figure S11. Separated IR-780 NPs signal from released IR-780 after Gaussian fitting.**

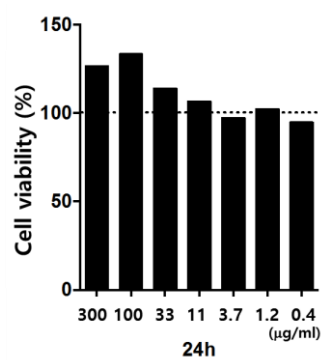

**Figure S12. Cell viability of ROS-ARP NPs after 24 hours incubation.**
